# Supplementary material for: Hydrogels generated by low-molecular-weight PEGylated luteolin and α-cyclodextrin through self-assembly for 5-fluorouracil delivery
Source: Royal Society of Chemistry journal article supplement (doi:10.1039/c6ra20851g), 2016-01-01
Supplement: c6ra20851g1.pdf [file c6ra20851g1.pdf]

## Hydrogels generated by low-molecular-weight PEGylated luteolin and $\alpha$ -cyclodextrin through self-assembly for 5-fluorouracil delivery

Weixia Qing,<sup>a,b</sup> Yong Wang,<sup>a</sup> Huan Li,<sup>a</sup> Jinhua Zhu,<sup>a</sup> Xiuhua Liu<sup>\*a,c</sup>

<sup>a</sup> Institute of Environmental and Analytical Sciences, College of Chemistry and Chemical Engineering, Henan University, Kaifeng, 475004, P.R. China.

<sup>b</sup> Medical College, Henan University, Kaifeng, 475004, P.R. China.

<sup>c</sup> Key Lab of Natural Medicine and Immun-engineering of Henan Province, Henan University, Kaifeng, 475004, P.R. China.

### 1. Characterizations of $\text{Fe}_3\text{O}_4$ particles

The SEM and TEM images, XRD and magnetization of  $\text{Fe}_3\text{O}_4$  particles are shown in Fig.S1. It is clear that  $\text{Fe}_3\text{O}_4$  particles are well dispersed and spherical in shape with average diameter of about 150 nm. Fig.S1C shows the XRD patterns of  $\text{Fe}_3\text{O}_4$  and all diffraction peaks are easily indexed and assigned to the typical cubic structure of  $\text{Fe}_3\text{O}_4$  (JCPDS Card 75-1609) [1]. The magnetization curve (Fig.S1D) implies that the saturation magnetization value of  $\text{Fe}_3\text{O}_4$  particles is about  $80.0 \text{ emu} \cdot \text{g}^{-1}$ .

[1] R. Zheng, S. Wang, Y. Tian, X. G. Jiang, D. L. Fu, S. Shen, W. L. Yang, Polydopamine-coated magnetic composite particles with an enhanced photothermal effect. *ACS Appl. Mater. Inter.*, 2015, 7, 15876-15884.

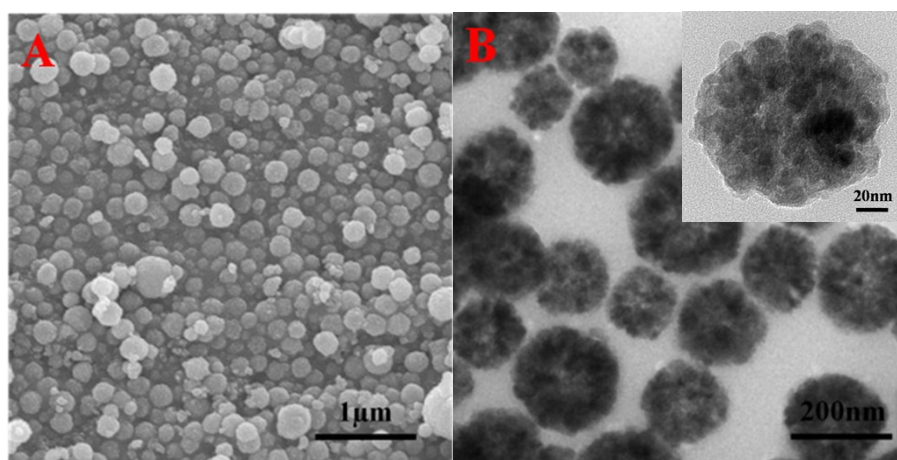

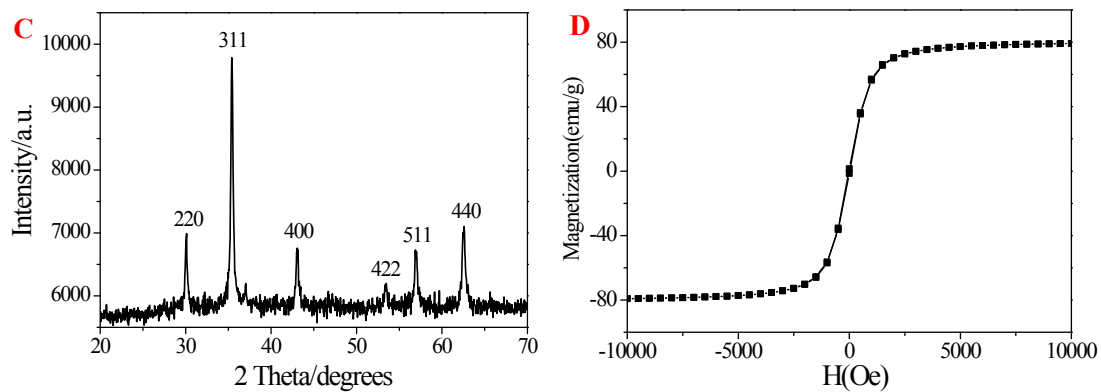

**Fig.S1.** SEM (A), TEM images (B), XRD (C) and magnetization (D) of Fe<sub>3</sub>O<sub>4</sub> particles.

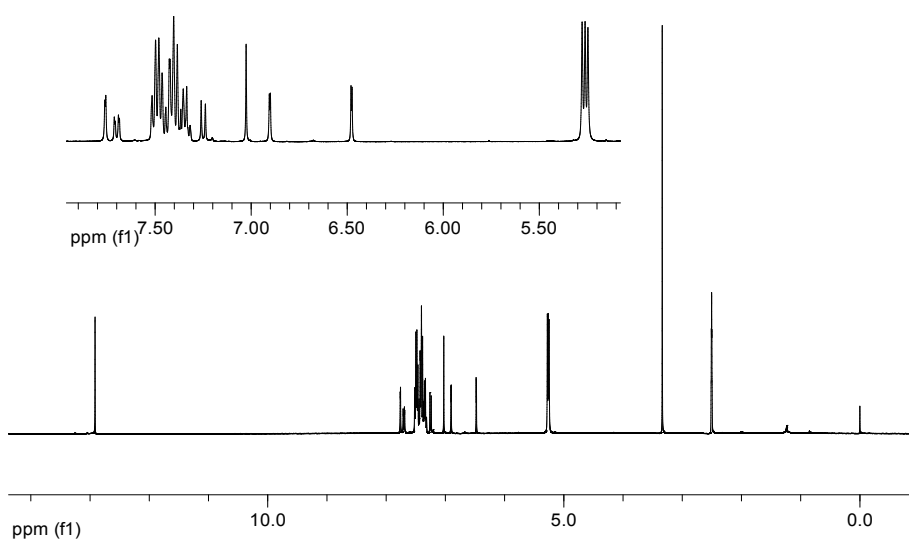

**Fig.S2** <sup>1</sup>H NMR spectrum of **2** in DMSO-*d*<sub>6</sub>.

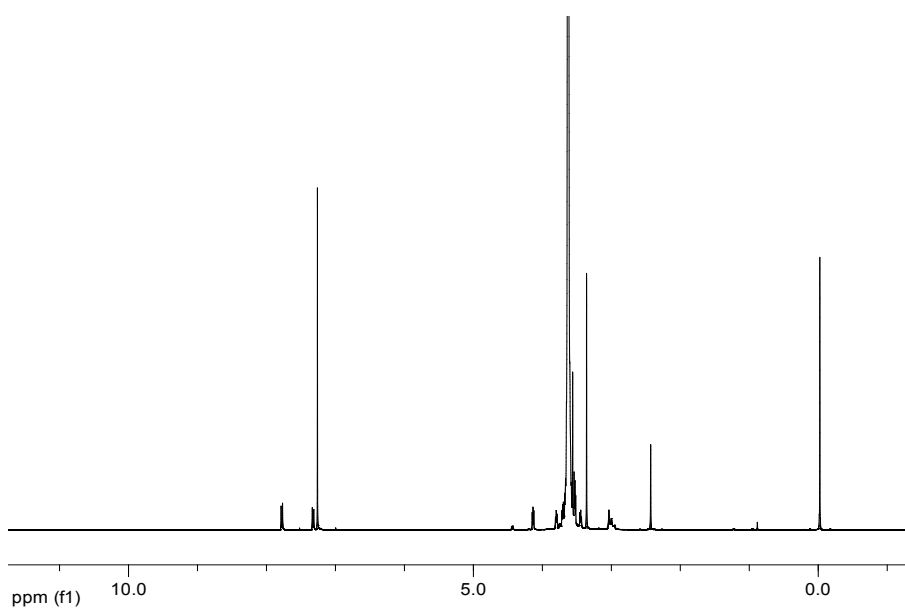

**Fig.S3** <sup>1</sup>H NMR spectrum of **3** in CDCl<sub>3</sub>.

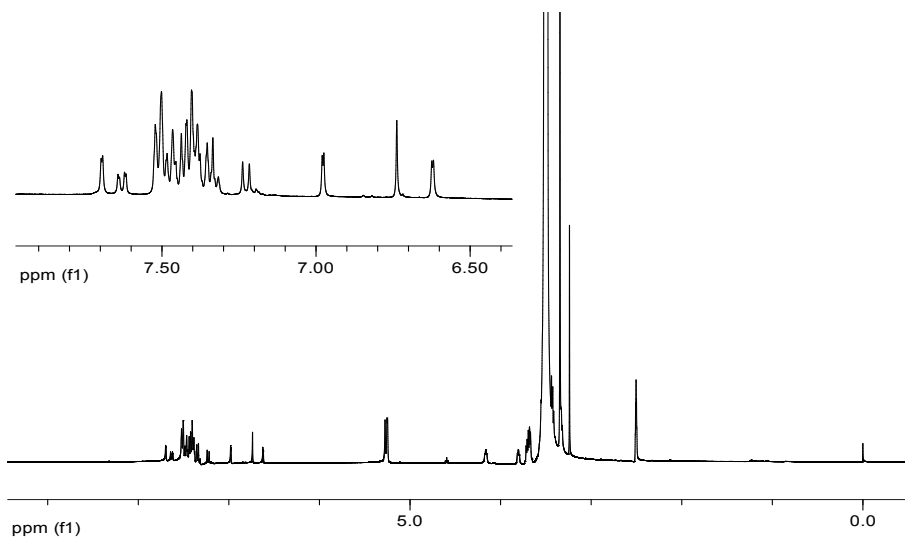

**Fig.S4**  $^1\text{H}$  NMR spectrum of **4** in  $\text{DMSO-}d_6$ .

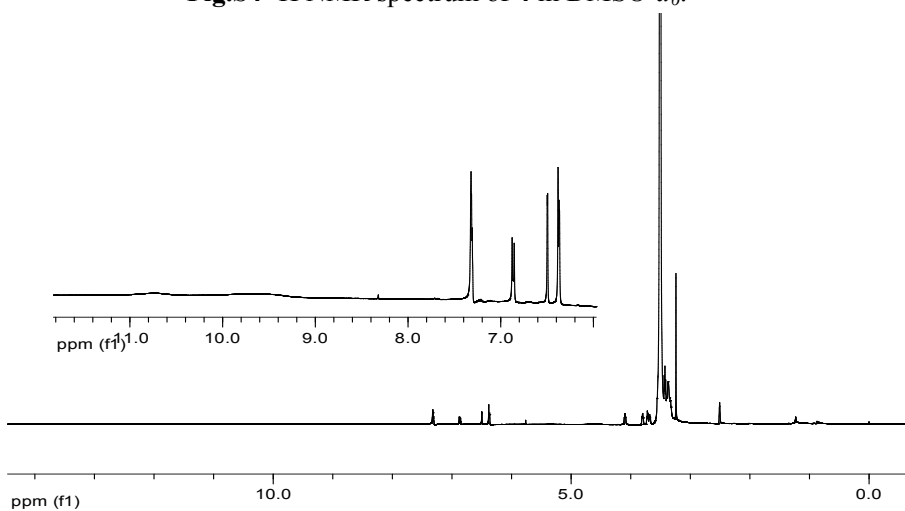

**Fig.S5**  $^1\text{H}$  NMR spectrum of **5** in  $\text{DMSO-}d_6$ .

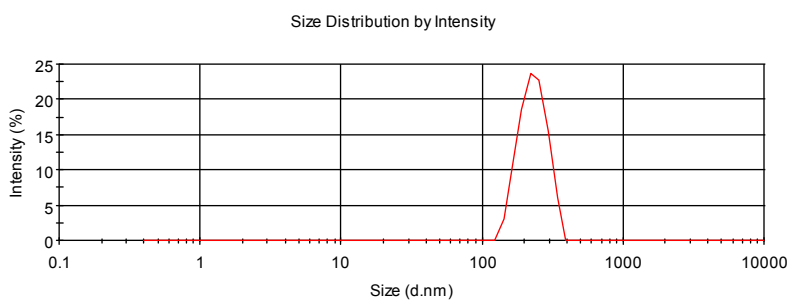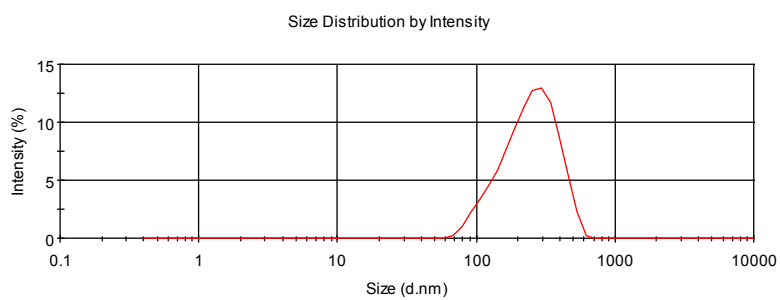

**Fig.S6.** The distributions of mPEG-LUT and mPEG-LUT- $\text{Fe}_3\text{O}_4$  conjugates
